# Supplementary material for: Humanized zebrafish enhance human hematopoietic stem cell survival and promote acute myeloid leukemia clonal diversity
Source: PubMed Central journal article supplement — Haematologica. 2019 Dec 19;105(10):2391–9. doi: 10.3324/haematol.2019.223040 (PMC7556680; doi:10.3324/haematol.2019.223040), 2019-12-19
Supplement: 2019_223040-DisclosuresContributions.pdf [file 2019_223040-DisclosuresContributions.pdf]

Haematologica  
HAEMATOL/2019/223040  
Version 4

Humanized zebrafish enhance human hematopoietic stem cell survival  
and promote acute myeloid leukemia clonal diversity

Vinothkumar Rajan, Nicole Melong, Wing Hing Wong, Benjamin King,  
R. Spencer Tong, Nithin Mahajan, Daniel Gaston, Troy Lund, David  
Rittenberg, Graham Dellaire, Clinton J.V. Campbell, Todd Druley, and  
Jason N. Berman

Disclosures: Funding sources Canadian Cancer Society Research Innovation grant received by Jason Berman, Kellsie's Hope Foundation and the Eli Seth Matthews Leukemia foundation for Todd Druley, Discovery Grant from the Natural Sciences and Engineering Research Council of Canada (NSERC) to Graham Dellaire.

Contributions: V.R. designed and performed experiments and wrote the paper; N.M. designed and performed experiments and edited the paper; W.H.W., S.T., and N.Ma. performed ECS studies and edited the paper; B.K. performed experiments and edited the paper; D.G. analyzed data and edited the paper; T.L., D.R., G.D. and C.J.V.C. provided reagents, advice and edited the paper; T.D. oversaw ECS experiments and edited the paper; J.N.B. originated the research concept, designed experiments, and edited the paper.
